# Supplementary material for: The conservation status and population decline of the African penguin deconstructed in space and time
Source: PubMed Central journal article supplement (PMC7417240; doi:10.1002/ece3.6554), 2020-07-09

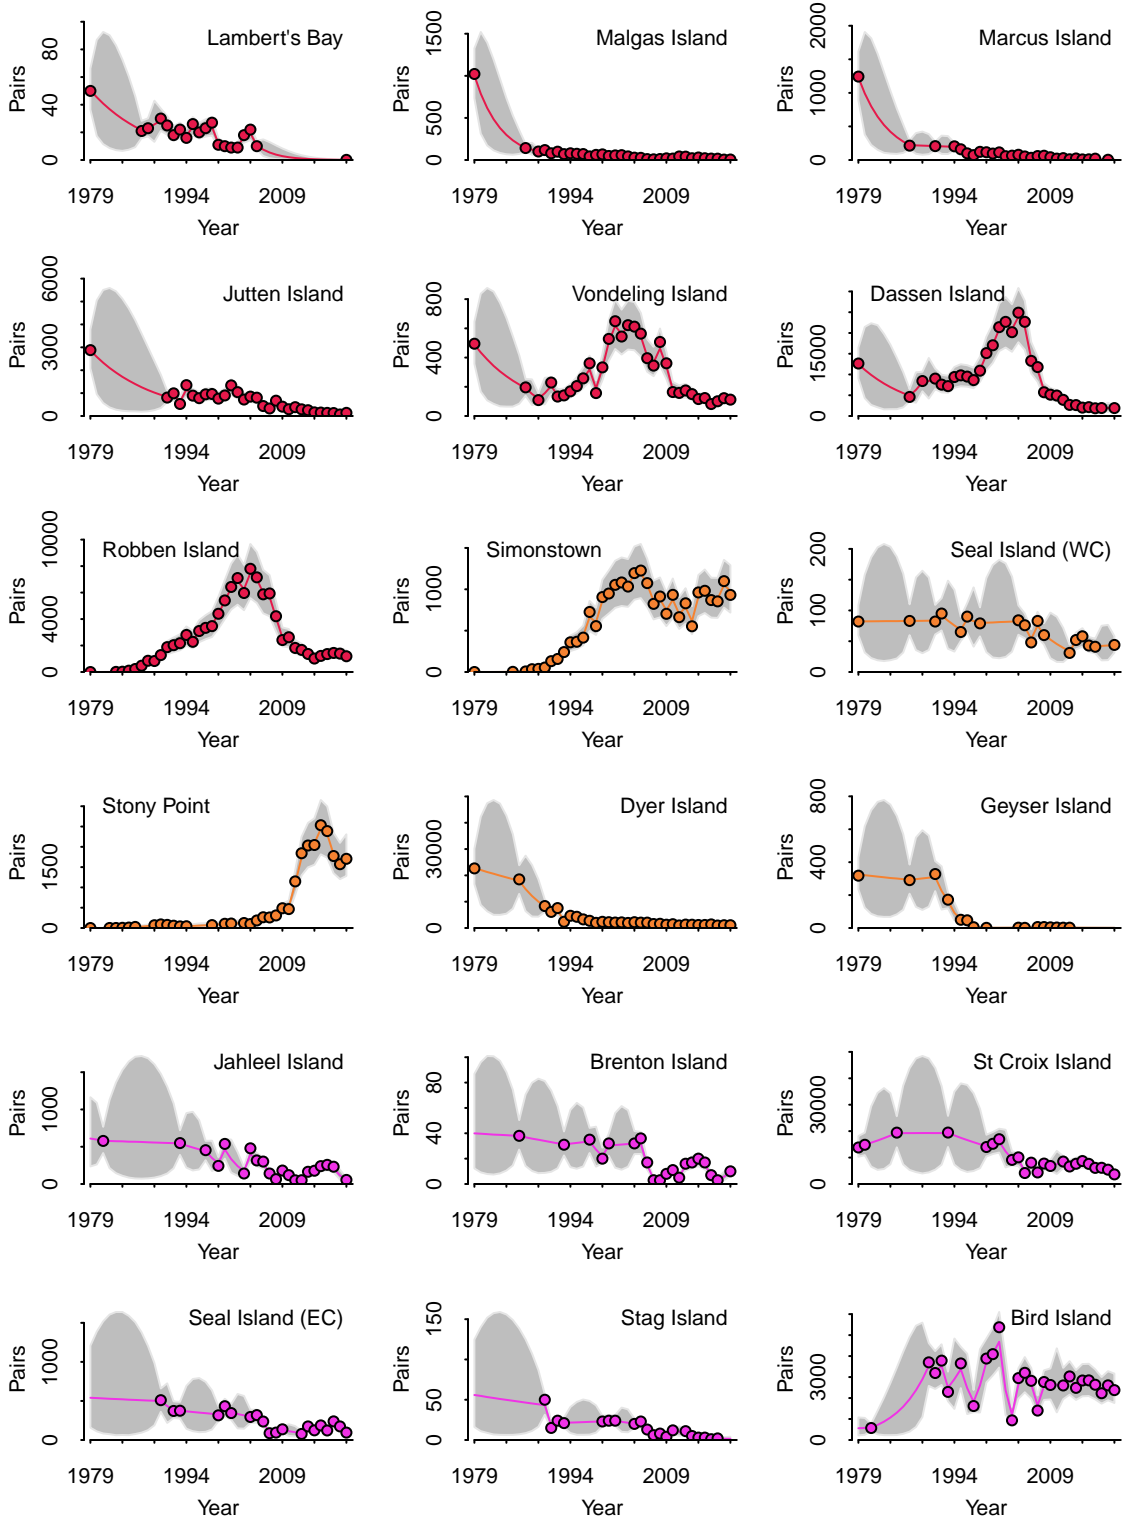

Supplement: ECE3-10-8506-s001.pdf [file ECE3-10-8506-s001.pdf]
